# Supplementary material for: Mesoporous carbon nanoparticles: a super catalyst support for fuel cells
Source: Royal Society of Chemistry journal article supplement (doi:10.1039/c5nj01430a), 2015-01-01
Supplement: c5nj01430a1.pdf [file c5nj01430a1.pdf]

## Electronic Supplementary Information

### Mesoporous Carbon Nanoparticles: A Super Catalyst Support for Fuel Cells

Xiaodie He,<sup>§</sup> Yalin Zhang,<sup>§</sup> Cheng Zhu, Hui Huang,\* Hailiang Hu,\* Yang Liu\* and Zhenhui Kang

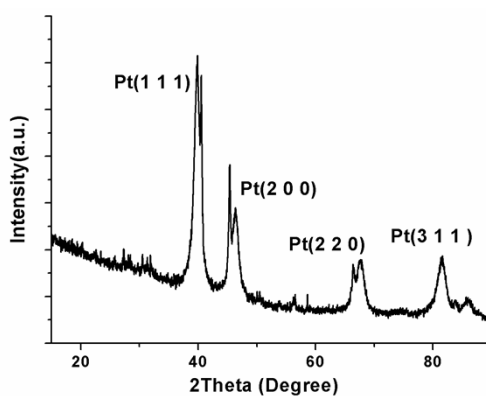

**Figure S1.** XRD patterns of MCNPS/Pt.

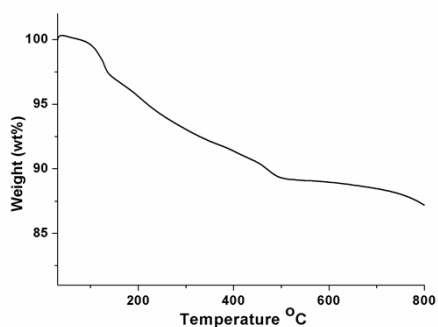

**Figure S2.** TG curve of MCNPS/Pt.

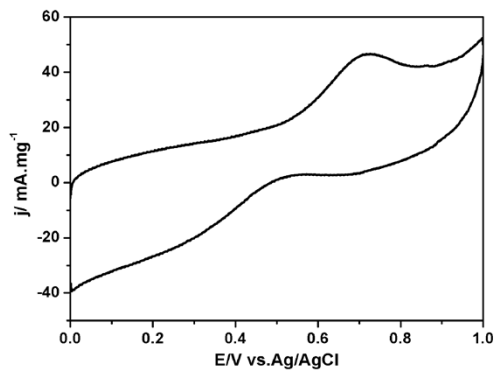

**Figure S3.** CV curves of MCNPs/Pt without using ionic liquid as stabilizer at the scan rate of  $50 \text{ mV s}^{-1}$  in  $(0.5 \text{ M H}_2\text{SO}_4)/(0.5 \text{ M CH}_3\text{OH})$  aqueous solution.

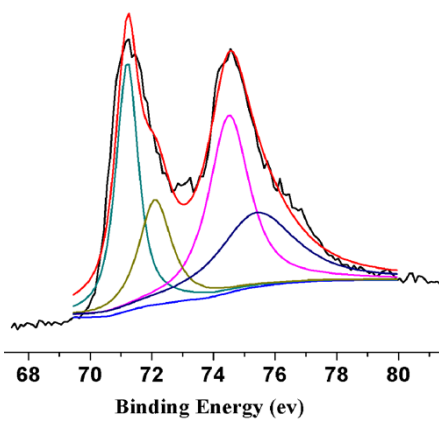

**Figure S4.** Pt 4f XPS spectra of MCNPs/Pt.
